# Supplementary material
Source: Springer Nature journal article supplement (https://www.springermedizin.de/resource/supplementary/13098_2014_383_MOESM2_ESM.pdf/9670892)

|                              |                   | <u>Component of HOMA-IR</u>                 |                |                          |        |
|------------------------------|-------------------|---------------------------------------------|----------------|--------------------------|--------|
| Variable                     | Component loading | t-statistic                                 | R <sup>2</sup> | Statistical significance |        |
|                              |                   |                                             |                |                          |        |
| matrix X                     | Leptin            | 0.443                                       | 34.03          | 0.810                    | p<0.01 |
|                              | BMI               | 0.406                                       | 40.44          | 0.735                    | p<0.01 |
|                              | TG                | 0.383                                       | 44.50          | 0.693                    | p<0.01 |
|                              | PAI-1             | 0.340                                       | 26.82          | 0.622                    | p<0.01 |
|                              | Testosterone      | -0.333                                      | -28.87         | -0.605                   | p<0.01 |
|                              | SHBG              | -0.264                                      | -11.98         | -0.483                   | p<0.01 |
|                              | ft3/ft4           | 0.221                                       | 7.21           | 0.397                    | p<0.01 |
|                              | Ghrelin           | -0.218                                      | -6.45          | -0.398                   | p<0.01 |
|                              | GMT               | 0.203                                       | 12.95          | 0.386                    | p<0.01 |
|                              | Adiponectin       | -0.196                                      | -7.67          | -0.358                   | p<0.01 |
|                              | Age               | -0.157                                      | -8.93          | -0.281                   | p<0.01 |
| vector Y                     | HOMA-IR           | 1.000                                       | 16.52          | 0.538                    | p<0.01 |
| <b>Explained variability</b> |                   | <b>41.4% (40.0% after cross-validation)</b> |                |                          |        |

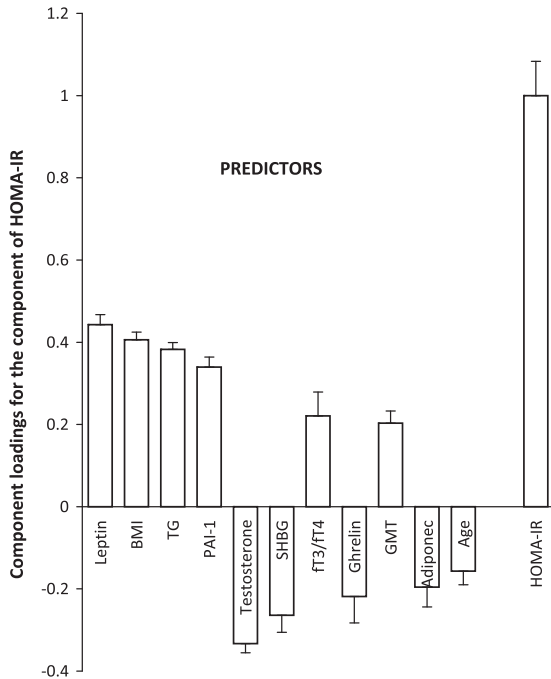

Supplement: MOESM2 [file 9670892]
